# Supplementary material
Source: PubMed Central journal article supplement (PMC3479572)
Supplement: 1207528109_pnas.201207528SI.pdf [file 1207528109_pnas.201207528SI.pdf]

# Supporting information

Qiao et al. 10.1073/pnas.1207528109

## SI Materials and Methods

**Bone Marrow Chimeric Mice.** For bone marrow (BM) transplantation experiments, the recipient mice were lethally irradiated with 960 rads 24 h before receiving BM transfers. Total BM cells were harvested from the femurs and tibias of donor mice (2–3 mo of age) and depleted of mature T cells, B cells, and MHC class II<sup>+</sup> lymphocytes by using a mixture of antibodies containing anti-CD4 (RL172), anti-CD8 (TIB105 and TIB210), anti-CD19 (1D3), and anti-MHC class II (M5/114) followed by complement-mediated lysis. BM cells from two different types of donor mice were mixed at the indicated ratio. Each recipient mouse received  $4\text{--}6 \times 10^6$  cells in 200  $\mu\text{L}$  of 1 $\times$  PBS via tail vein injection. All BM chimeras were reconstituted for 4–6 wk before the analysis of T-cell development and function.

**Flow Cytometry.** Cells were preincubated with the anti-Fc $\gamma$ R mAb 2.4G2 to block nonspecific antibody binding before they were stained with the FITC-, PE-, PerCP-, PE-Cy7-, APC-, APC-Cy7- or biotin-conjugated antibodies as listed in *Materials and Methods*. Events were acquired on a FACSCanto (BD) flow cytometer, and the data were analyzed with the FlowJo software (Tree Star).

**Th1 Differentiation.** CD4 cells were purified from single-cell suspensions of splenocytes from chimeric mice with antimouse CD4

microbeads (Miltenyi Biotec). CD4 T cells ( $1 \times 10^6/\text{mL}$ ) were stimulated with 5  $\mu\text{g}/\text{mL}$  plate-bound anti-CD3e (145-2C11) for 5 d with 1  $\mu\text{g}/\text{mL}$  anti-CD28 (37.51), 3.5 ng/mL IL-12 (Roche), 10  $\mu\text{g}/\text{mL}$  anti-IL-4 (11B11) and 50 units of IL-2 (Roche).

**Cytokine Intracellular Staining.** Differentiated Th1 CD4 T cells were stimulated with 50 ng/mL phorbol myristyl acetate and 1.5  $\mu\text{M}$  ionomycin (Calbiochem) for 5 h. Monensin (Sigma) at 3  $\mu\text{M}$  was added during the last 3 h of stimulation. Activated Th1 cells were stained with anti-CD45.1 and anti-CD45.2 antibodies. Cells were then fixed in 2% (wt/vol) paraformaldehyde for 30 min at room temperature and permeabilized with 0.2% (wt/vol) saponin (Sigma), followed by staining with anti-IL-4 and anti-IFN- $\gamma$  for flow cytometry.

**PLZF Intracellular Staining.** PLZF staining was done using the Foxp3 staining buffer set (eBioscience) and following the protocol according to the company, except that anti-Foxp3 mAb was replaced by antimouse PLZF mAb.

**Statistical Analysis.** The two-tailed Student *t* test was used to analyze the statistical significance of the difference between groups as indicated. A *P* value smaller than 0.05 was considered statistically significant.

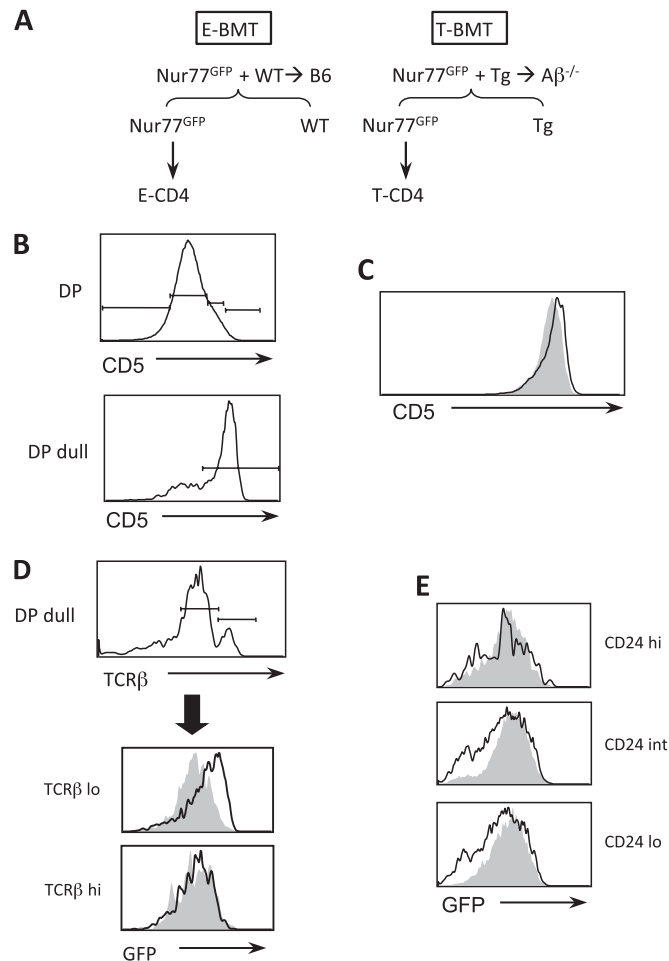

**Fig. S1.** Nur77<sup>GFP</sup> expression in T- and E-CD4 T cells. (A) Generation of Nur77<sup>GFP</sup> E- and T-CD4 T cells. To produce Nur77<sup>GFP</sup> E-CD4 T cells, Nur77<sup>GFP</sup> BM cells (CD45.2<sup>+</sup>) were cotransferred with WT BM (CD45.1<sup>+</sup>CD45.2<sup>+</sup>) into B6.SJL hosts (CD45.1<sup>+</sup>) [Nur77<sup>GFP</sup>+WT→B6] (E-BMT). For Nur77<sup>GFP</sup> T-CD4 T cells, Nur77<sup>GFP</sup> and Tg BM cells were cotransferred into lethally irradiated MHC class II-deficient hosts resulting in [Nur77<sup>GFP</sup>+Tg→Aβ<sup>-/-</sup>] T-BMT. E- and T-CD4 T cells that were originated from Nur77<sup>GFP</sup> BM were compared for their GFP expression. (B) CD5 expression of cells analyzed in Fig. 1C. (C) GFP<sup>+</sup> DP dull cells were gated from E- (shaded) and T-BMT (line) and CD5 levels were compared. (D) TCRβ lo but not TCRβ hi DP thymocytes from T-BMT mice express higher GFP than that of E-BMT mice. Shaded and line histograms indicate cells from E- and T-BMT mice. (E) CD4 SP thymocytes were divided on the basis of the level of CD24 expression in E- and T-CD4 T cells and GFP expression of less mature to more mature cells was compared. Shaded and line histograms indicate cells from E- and T-BMT mice.

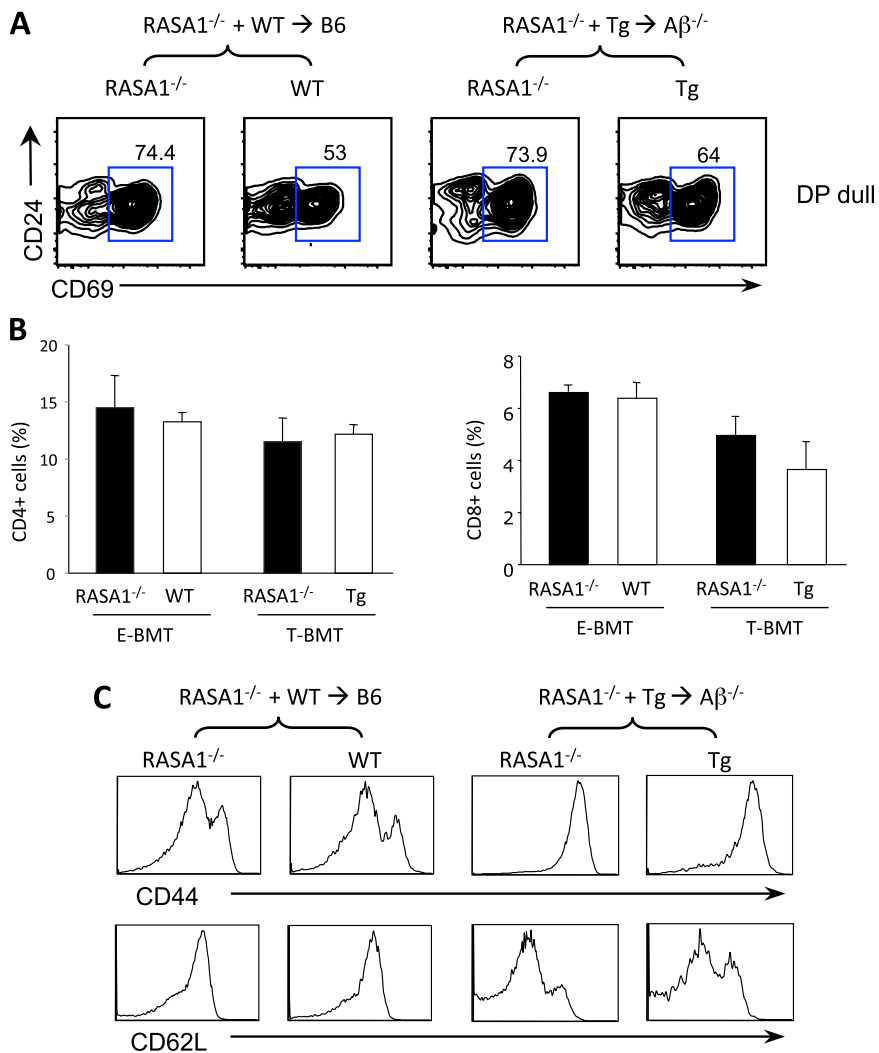

**Fig. S2.** The development of T-CD4 T cells with RASA1 deficiency. (A) RASA1 deficiency induces CD69<sup>hi</sup> cells. [RASA1<sup>-/-</sup>+WT→B6] E-BMT and [RASA1<sup>-/-</sup>+Tg→Aβ<sup>-/-</sup>] T-BMT were constructed and DP dull populations were gated and compared for CD69 and CD24 expression. Numbers show the percentage of gated CD69<sup>hi</sup> cells in the DP dull population. (B) Splenic cells from the same chimeras in A were used to assess peripheral CD4 and CD8 T-cell percentages. Shown are mean ± SD. (C) Representative CD44 and CD62L expression of splenic CD4 T cells from RASA1<sup>-/-</sup> BM chimeras.

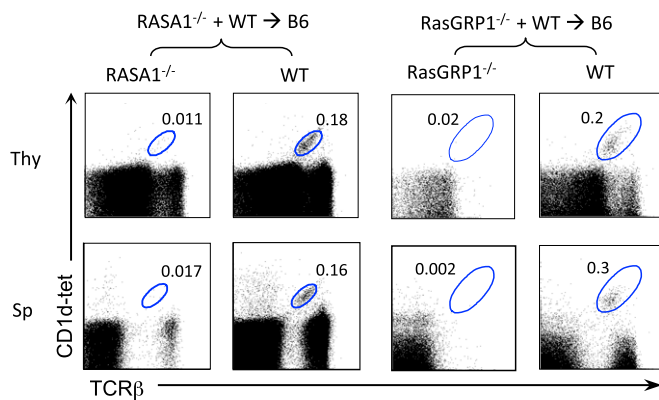

**Fig. S3.** iNKT cell development was severely reduced in the absence of RASA1 or RasGRP1. Total thymocytes and splenocytes from indicated mice were analyzed to examine iNKT cells using TCRβ and PBS-57-loaded CD1d-tetramers. Numbers indicate the percentages of iNKT cells among total thymocytes or splenocytes. Data are representative of five pairs of mice.

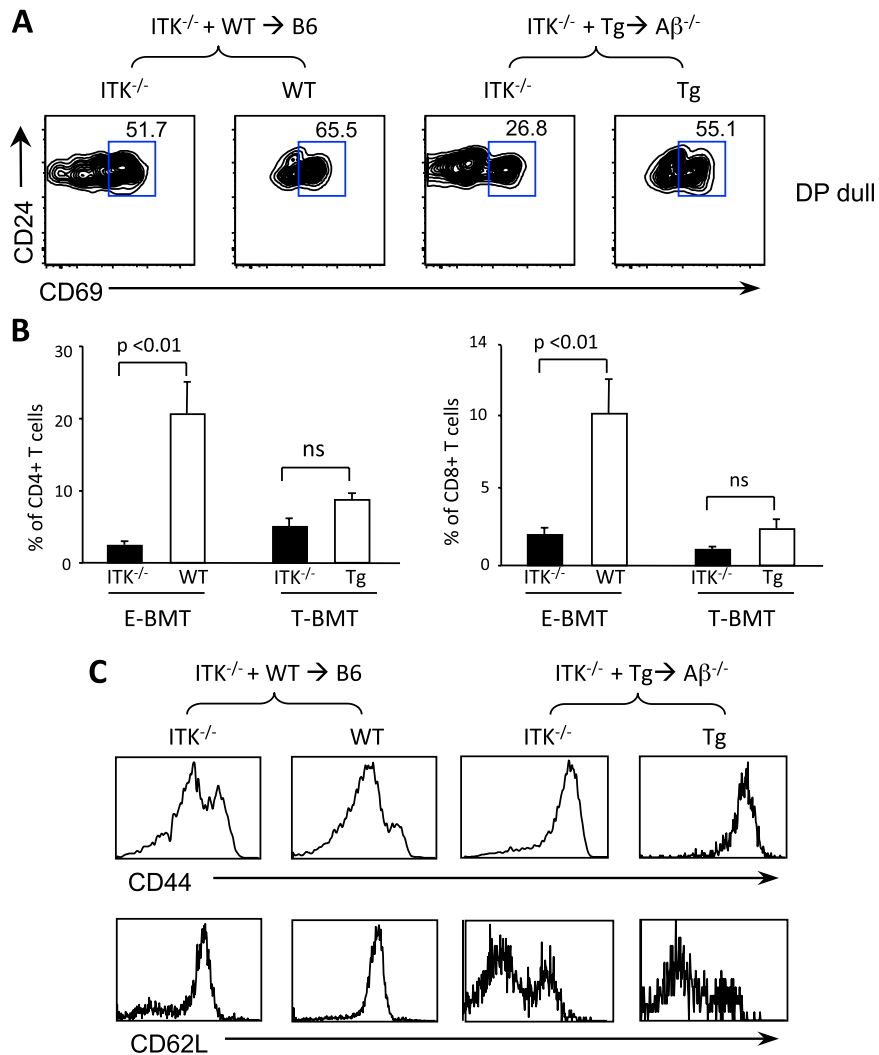

**Fig. S4.** Deficiency of ITK did not affect effector phenotype of T-CD4 T cells. (A) ITK deficiency reduces CD69<sup>hi</sup> cells. [ITK<sup>-/-</sup>+WT→B6] E-BMT and [ITK<sup>-/-</sup>+Tg→Aβ<sup>-/-</sup>] T-BMT were constructed and DP dull populations were gated and compared for CD69 and CD24 expression. Numbers show the percentage of gated CD69<sup>hi</sup> cells in the DP dull population. (B) Summary of splenic CD4 and CD8 T-cell percentages. Shown are mean ± SD. (C) Representative CD44 and CD62L expression of splenic CD4 T cells from ITK<sup>-/-</sup> BM chimeras.

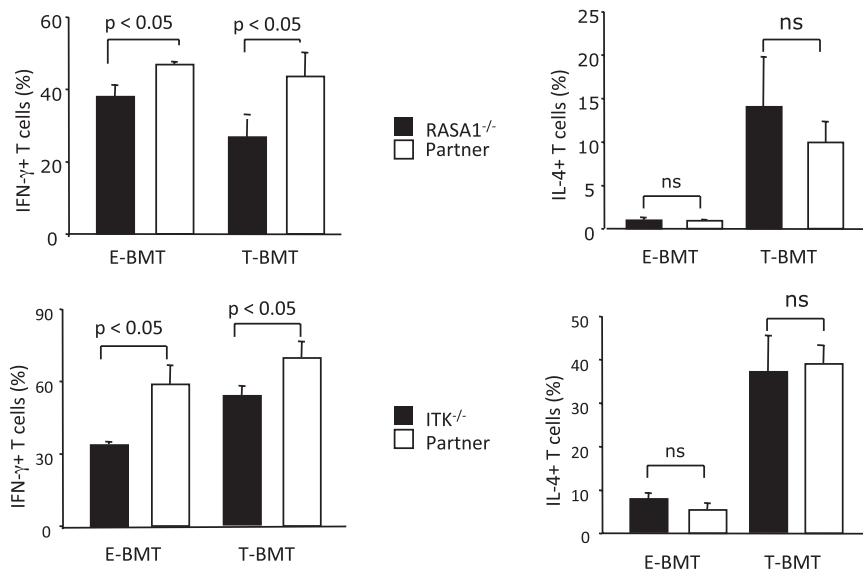

**Fig. S5.** Effector function of T-CD4 T cells is not affected by the strength of TCR signaling. Summary of the percentages of IFN- $\gamma$ - or IL-4-producing cells in the experiments of Fig. 5. Shown are mean  $\pm$  SD.

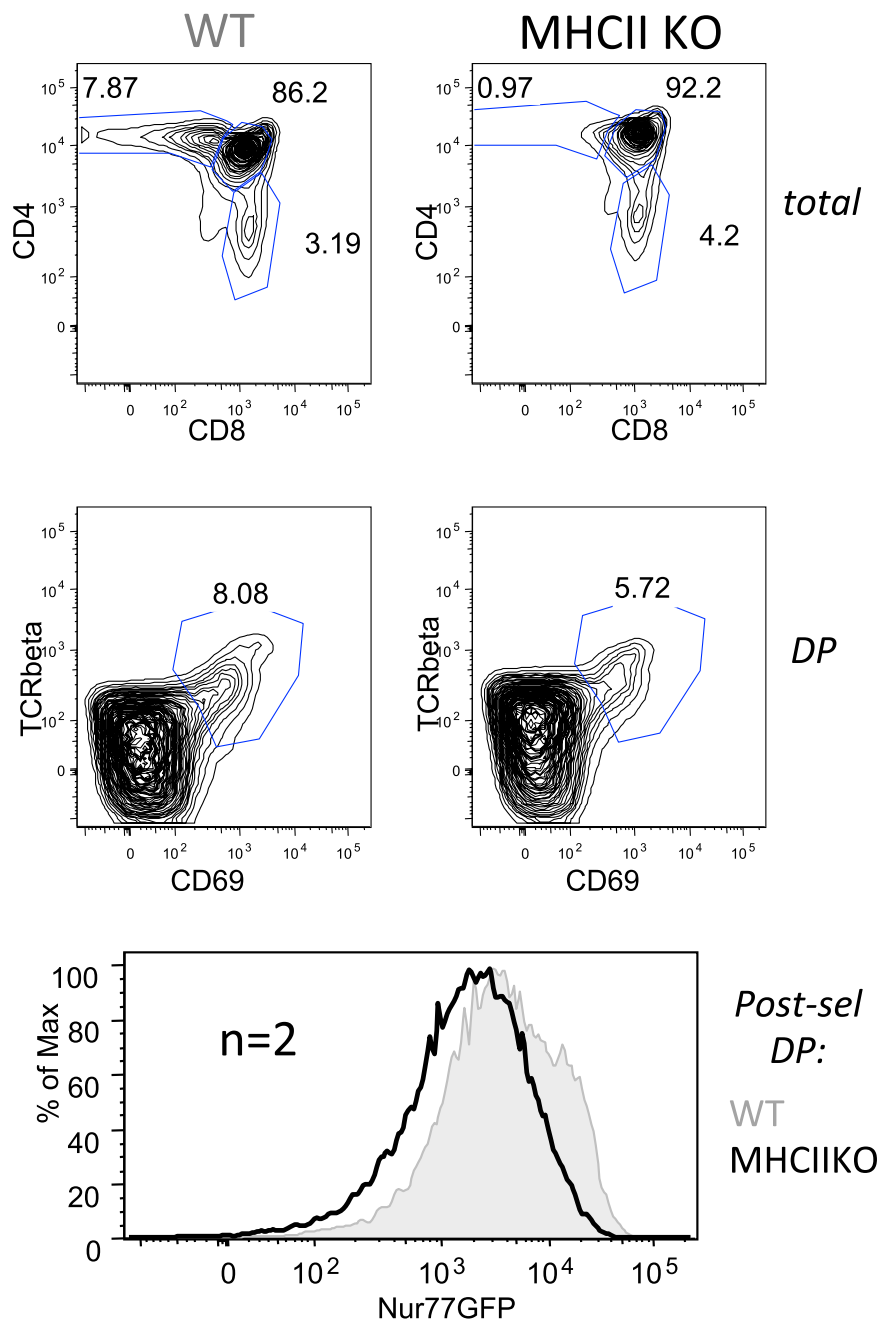

**Fig. S6.** TCRβ<sup>+</sup> CD69<sup>hi</sup> DP from wild-type Nur77<sup>GFP</sup> (WT) and Nur77<sup>GFP</sup>/Aβ<sup>-/-</sup> (MHCIIKO) mice were compared for Nur77 levels. Histograms show postselected TCRβ<sup>+</sup> CD69<sup>hi</sup> DP cells. Two pairs of mice are represented.
